# Supplementary material for: Identification of the B-Raf/Mek/Erk MAP kinase pathway as a target for all-trans retinoic acid during skin cancer promotion
Source: Mol Cancer. 2009 May 11;8:27. doi: 10.1186/1476-4598-8-27 (PMC2685120; doi:10.1186/1476-4598-8-27)
Supplement: Additional file 3 — Previously identified TPA regulated genes that are oppositely regulated by TPA and ATRA. The table shows average raw signals for selected genes represented as in Table 1. [file 1476-4598-8-27-S3.xls]

## Sheet: Table 2 sh
Table 2: Previously identified TPA regulated genes
Gene ID	CON	TPA	T+A	Gene Identifier
Ivl	5620	9660.6	6323.2	NM_008412
Krt2-18	80318.6	86527.3	77286.6	NM_016879
Krt2-6a	18084.4	244162	22319.2	NM_008476
Mmp13	51.9	653.9	182	NM_008607
Col1a2	63246.2	43068.3	61532.3	BF227507
			Oxidative stress pathway
								Keap1
